# Supplementary material for: Useful Electrocardiographic Signs to Support the Prediction of Favorable Response to Cardiac Resynchronization Therapy
Source: MDPI journal article supplement (doi:10.3390/jcdd10100425), 2023-10-14
Supplement: s1 [file s1]

# Useful electrocardiographic signs helping the prediction of favorable response to cardiac resynchronization therapy

## Supplementary material

**Supplementary Table S1.** Sensitivity and specificity values for ECG signs associated with CRT response from the original publications (if they were available).

| Predictors of response                                                                                                                           | Sensitivity        | Specificity        |
|--------------------------------------------------------------------------------------------------------------------------------------------------|--------------------|--------------------|
| <b>True-LBBB</b>                                                                                                                                 |                    |                    |
| QRS duration $\geq 130$ ms in women and $\geq 140$ ms in men<br>Mid-QRS notching and/or slurring in two contiguous leads in V1-2 or I-aVL, V5-V6 | 71.3 – 40%         | 40.0 – 64.1%       |
| Absence of q waves in the lateral leads                                                                                                          | 21%                | 87%                |
| Absence of R wave in V1 ( $\geq 1$ mm)                                                                                                           | 67.6%              | 53.9%              |
| 45 ms $\leq$ between the peak of the R to the nadir of the S wave in V1                                                                          | 86.1%              | 66.7%              |
| <b>Non-true LBBB and non-LBBB</b>                                                                                                                |                    |                    |
| ID in lead I $\geq 110$ ms, ID in lead aVL $\geq 130$ ms and ID/QRS duration $> 0.69$ in lead I                                                  | 83.0%              | 81.0%              |
| Masquerading bundle branch block                                                                                                                 | 81.0%              | 71.0%              |
| ID in lead V6 $> 60$ ms                                                                                                                          | 82.8%              | 78.8%              |
| QR-max index $> 120$ ms                                                                                                                          | 63.4 – 91.9%       | 82.8 – 56.7%       |
| [ID in lead I – ID in lead V1] $> 90$ ms<br>[aVLID – aVFLID]/QRSd $> 25\%$<br>V <sub>5</sub> ID – V <sub>1</sub> ID]/QRSd $> 25\%$               | 95.7 – 100%        | 14.3 – 50%         |
| <b>Predictors of non-response</b>                                                                                                                | <b>Sensitivity</b> | <b>Specificity</b> |
| <b>Non-true LBBB and non-LBBB</b>                                                                                                                |                    |                    |
| More than 2 notches on the R wave or the nadir of the S wave                                                                                     | 68.9%              | 81.6%              |
| $< 32.5$ ms to the beginning of the QRS fragmentation from the QRS onset and a longer fractionation duration                                     | 83.3%              | 85.7%              |
| Lead one ratio $< 12$                                                                                                                            | 33.3%              | 77.1%              |

LBBB: left bundle branch block; ID: intrinsicoid deflection.
